# Supplementary material for: In Utero Exposure to Maternal Diabetes Impairs Vascular Expression of Prostacyclin Receptor in Rat Offspring
Source: PubMed Central journal article supplement — Diabetes. 2010 Jul 9;59(10):2597–602. doi: 10.2337/db10-0311 (PMC3279527; doi:10.2337/db10-0311), 2010-07-09
Supplement: supp_db10-0311_db10-0311onlineappendix.pdf [file supp_db10-0311_db10-0311onlineappendix.pdf]

Supplementary Table 2 : 119 differentially expressed between aorta of DMO and CMO at 3 months of age

| <b>Gene</b> | <b>Description</b>                                  | <b>Score</b> | <b>Fold-change</b> | <b>Classification</b>    |
|-------------|-----------------------------------------------------|--------------|--------------------|--------------------------|
| Sephs2      | selenophosphate synthase 2                          | 2.680        | 3.7                | Metabolism               |
| TC527743    | mus-musculus 16 days embryo head cDNA               | 2.644        | 14.1               | Gene/proteine expression |
| Cyp8b1      | cytochrome P450 family 8, subfamily b, polypeptide1 | 2.554        | 8.1                | Metabolism               |
| Papd4       | PAP associated domain containing 4                  | 2.411        | 11.9               | Gene/proteine expression |
| TC525459    | Q7RYV7 predicted protein                            | 2.355        | 9.2                | Gene/proteine expression |
| Stk23       | serine/threonine kinase 23                          | 2.332        | 18.2               | Signaling/Communication  |
| Gtf2e1      | general transcription factor IIE, polypeptide 1     | 2.283        | 2.1                | Gene/proteine expression |
| Reg1        | regenerating islet-derived 1                        | 2.254        | 6.6                | Signaling/Communication  |
| St14        | supression of tumogenicity 14                       | 2.159        | 7.5                | Cell defense             |
| Mep1a       | mepirin 1 alpha                                     | 2.156        | 11.6               | Gene/proteine expression |
| XM_343611   | similar to nuclear autoantigen Sp-100               | 2.154        | 2.7                | Cell defense             |
| Znrf1       | zinc and ring finger 1                              | 2.137        | 10.9               | Gene/proteine expression |
| Ar111       | ADP-ribosylation factor-like 11                     | 2.101        | 2.3                | Signaling/Communication  |
| TC561804    | collagen protein 50, partial o01662                 | 2.080        | 3.0                | Cell structure/Motility  |
| Glrb        | glycine receptor, beta subunit                      | 2.069        | 11.2               | Signaling/Communication  |
| Gjb1        | gap junction membrane chanel protein beta 1         | 2.053        | 3.6                | Cell structure/Motility  |
| Sh3glb1     | SH3-domaine GRB2-like B1                            | 2.049        | 7.9                | Signaling/Communication  |
| Stx7        | syntaxin 7                                          | 1.995        | 8.8                | Signaling/Communication  |
| LOC497703   | hypothetical protein                                | 1.993        | 2.5                | unclassified             |
| Cdh1        | cadherin 1                                          | 1.982        | 2.9                | Signaling/Communication  |
| Dmx11       | dmx-like 1                                          | 1.945        | 1.9                | unclassified             |
| LOC313672   | similar to CG11206-PA                               | 1.941        | 6.6                | Gene/proteine expression |
| Olr726      | olfactory receptor 726                              | 1.941        | 9.1                | Signaling/Communication  |
| LOC305452   | hypothetical protein                                | 1.920        | 4.9                | unclassified             |
| Tyrobp      | tyro protein tyrosine kinase binding protein        | 1.891        | 4.3                | Signaling/Communication  |
| RGD1311805  | similar to RIKEN cDNA 2400010D15                    | 1.883        | 5.2                | unclassified             |
| TC519817    | extensin like protein, partial                      | 1.879        | 3.5                | Cell structure/Motility  |

|            |                                                       |       |      |                          |
|------------|-------------------------------------------------------|-------|------|--------------------------|
| Cyp4f4     | cytochrome P450 family 4, subfamily f, polypeptide4   | 1.874 | 2.6  | Metabolism               |
| Mdk        | midkine                                               | 1.857 | 7.0  | Signaling/Communication  |
| Coq3       | coenzyme Q3 homolog, methyltransferase                | 1.854 | 4.3  | Metabolism               |
| Nr1h4      | nuclear receptor subfamily 1, groupe h, member 4      | 1.839 | 4.6  | Signaling/Communication  |
| XM_232197  | fibulin 2 (Fbln2)                                     | 1.834 | 2.9  | Cell structure/Motility  |
| Cyb561     | cytochrome b-561                                      | 1.828 | 3.0  | Metabolism               |
| Sf4        | splicing factor 4                                     | 1.825 | 6.1  | Gene/proteine expression |
| TC539680   | odorant binding protein 2 precursor, partial          | 1.824 | 5.0  | Gene/proteine expression |
| Tfec       | transcription factor EC                               | 1.815 | 6.0  | Gene/proteine expression |
| Six3       | sine oculis homeobox homolog 3                        | 1.813 | 8.3  | Gene/proteine expression |
| LOC299707  | similar to RIKEN cDNA 2900091E11                      | 1.807 | 5.2  | unclassified             |
| TC539966   | Protocadherin beta 9, partial (14%)                   | 1.806 | 7.5  | Signaling/Communication  |
| Pcdh18     | protocadherin 18                                      | 1.792 | 2.4  | Signaling/Communication  |
| Cyp4f2     | cytochrome P450, family 4, subfamily f, polypeptide 2 | 1.782 | 2.0  | Metabolism               |
| Adcy4      | adenylate cyclase 4                                   | 1.776 | 10.1 | Gene/proteine expression |
| Tm6sf1     | transmembrane 6 superfamily member 1                  | 1.775 | 3.3  | unclassified             |
| BC086428   | catalytic subunit of DNA polymerase zeta RAD54 like   | 1.762 | 4.2  | Cell division            |
| Cckbr      | cholecystokinin B receptor                            | 1.761 | 4.1  | Signaling/Communication  |
| Olr1077    | olfactory receptor 1066                               | 1.761 | 6.1  | Signaling/Communication  |
| BX883044   | major histocompatibility complex                      | 1.761 | 4.8  | Cell defense             |
| RGD1310571 | similar to hypothetical protein                       | 1.760 | 7.5  | unclassified             |
| Rshl2      | radial spokehead-like 2                               | 1.759 | 4.2  | unclassified             |
| LOC287881  | similar to phosphatase 1, myosin binding subunit      | 1.750 | 6.4  | Cell structure/Motility  |
| Cnm4       | cyclin M4                                             | 1.742 | 3.4  | Cell division            |
| TC551080   | jumping translocation breakpoint protein precursor    | 1.742 | 2.9  | Gene/proteine expression |
| XM_223397  | similar to hypothetical protein                       | 1.741 | 5.8  | unclassified             |
| XM_343799  | similar to sorting nexin 12                           | 1.727 | 9.5  | unclassified             |
| XM_341491  | similar to Rxrip110 protein                           | 1.721 | 7.8  | unclassified             |
| Gp2        | glycoprotein 2                                        | 1.712 | 7.8  | Cell structure/Motility  |
| LOC363517  | similar to plexin B3 precursor                        | 1.709 | 1.5  | Gene/proteine expression |

|           |                                                                           |        |     |                          |
|-----------|---------------------------------------------------------------------------|--------|-----|--------------------------|
| XM_215080 | similar to RIKEN cDNA 3230401O13                                          | 1.709  | 2.0 | unclassified             |
| LOC367235 | similar to KIAA1411 protein                                               | 1.708  | 4.9 | unclassified             |
| LOC500133 | similar to caspase recruitment domain protein 4                           | 1.703  | 5.6 | Cell division            |
| Faim2     | fas apoptotic inhibitory molecule 2                                       | 1.702  | 3.9 | Cell division            |
| Znf297    | zinc finger protein 297                                                   | 1.698  | 5.6 | Gene/proteine expression |
| Tcp11     | T complex 11                                                              | -3.130 | 0.3 | Cell defense             |
| LOC294930 | similar to arylacetamide deacetylase                                      | -3.057 | 0.1 | Metabolism               |
| LOC363931 | similar to pseudoautosomal GTP-binding protein                            | -2.820 | 0.2 | Gene/proteine expression |
| TC525105  | PmbA family protein, partial                                              | -2.404 | 0.3 | Gene/proteine expression |
| Lrrn6a    | leucine rich repeat neuronal 6A                                           | -2.393 | 0.3 | unclassified             |
| Mapkbp1   | mitogen activated protein kinase binding protein 1                        | -2.389 | 0.2 | Signaling/Communication  |
| Gpr54     | G protein-coupled receptor 54                                             | -2.352 | 0.4 | Signaling/Communication  |
| Bad       | Bcl2-associated death promoter                                            | -2.320 | 0.5 | Cell division            |
| Os-9      | amplified in osteosarcoma                                                 | -2.315 | 0.5 | Gene/proteine expression |
| Gsdmdc1   | gasdermin domain containing 1                                             | -2.221 | 0.3 | unclassified             |
| P2rx2     | purinergic receptor P2X                                                   | -2.198 | 0.3 | Signaling/Communication  |
| Clcn6     | chloride channel 6                                                        | -2.177 | 0.4 | Cell structure/Motility  |
| Taf5l     | TAF 5-like RNA polymerase II                                              | -2.169 | 0.3 | Gene/proteine expression |
| LOC306622 | hypothetical protein                                                      | -2.166 | 0.2 | unclassified             |
| Mtvr2     | mammary tumor virus receptor 2                                            | -2.120 | 0.4 | Signaling/Communication  |
| Rpl41     | ribosomal protein L41                                                     | -2.118 | 0.7 | Gene/proteine expression |
| P4ha2     | procollagen-proline, 2-oxoglutarate 4-dioxygenase,<br>alphaII polypeptide | -2.108 | 0.4 | Cell structure/Motility  |
| Aip       | aryl-hydrocarbon receptor                                                 | -2.100 | 0.5 | Signaling/Communication  |
| MGC94635  | putative secreted protein ZSIG11                                          | -2.082 | 0.5 | unclassified             |
| Cad       | carbamoyl-phosphate synthetase 2                                          | -2.064 | 0.5 | Metabolism               |
| Arf5      | ADP rybosylation factor 5                                                 | -2.056 | 0.2 | Gene/proteine expression |
| Rps6ka2   | ribosomal protein S6 kinase polypeptide 2                                 | -2.048 | 0.4 | Gene/proteine expression |
| Tbx2      | T-box 2                                                                   | -2.042 | 0.4 | Gene/proteine expression |
| Zc3hdc5   | zinc finger CCCH type domain containing 5                                 | -2.021 | 0.4 | Gene/proteine expression |

|            |                                                                                         |        |     |                          |
|------------|-----------------------------------------------------------------------------------------|--------|-----|--------------------------|
| Psd        | pleckstrin and sec7 domain containing                                                   | -2.018 | 0.5 | Gene/proteine expression |
| Crygd      | crystallin gammaD                                                                       | -2.017 | 0.5 | Cell structure/Motility  |
| XM_217744  | similar to putative K-chloride cotransporter 4                                          | -2.008 | 0.2 | Signaling/Communication  |
| A2m        | alpha-2 macroglobulin                                                                   | -2.005 | 0.3 | Gene/proteine expression |
| BX883046   | major histocompatibility complex                                                        | -1.992 | 0.4 | Cell defense             |
| D28966     | mRNA for prostacyclin receptor                                                          | -1.990 | 0.5 | Signaling/Communication  |
| AI233699   | EST                                                                                     | -1.987 | 0.6 | unclassified             |
| Mog        | myelin oligodendrocyte glycoprotein                                                     | -1.986 | 0.4 | Cell structure/Motility  |
| Bat2       | HLA-B associated transcript 2                                                           | -1.964 | 0.4 | Cell defense             |
| Ssh3       | slingshot homolog 3                                                                     | -1.960 | 0.3 | Gene/proteine expression |
| Pdrp       | PDRP protein                                                                            | -1.959 | 0.5 | unclassified             |
| Per1       | period homolog 1                                                                        | -1.946 | 0.2 | Gene/proteine expression |
| Sepw1      | selenoprotein W, muscle 1                                                               | -1.946 | 0.3 | Cell defense             |
| Ppp3cb     | protein phosphatase 3                                                                   | -1.944 | 0.4 | Signaling/Communication  |
| Evl        | enabled vasodilator stimulated phosphoprotein                                           | -1.927 | 0.5 | Cell structure/Motility  |
| LOC303039  | similar to KIAA0869 protein                                                             | -1.924 | 0.4 | unclassified             |
| Ppt2       | palmitoyl protein thioesterase 2                                                        | -1.924 | 0.3 | Signaling/Communication  |
| Pnlcd1     | poly(A)-specific ribonuclease-like domain containing 1                                  | -1.919 | 0.4 | Gene/proteine expression |
| RGD1306222 | similar to 1810034B16 RIK protein                                                       | -1.917 | 0.5 | unclassified             |
| RGD1310143 | similar to RIKEN cDNA DO30028016                                                        | -1.915 | 0.4 | unclassified             |
| Creb3l2    | cAMP responsive element binding protein 3-like2                                         | -1.904 | 0.5 | Gene/proteine expression |
| Usp20      | ubiquitin specific protease 20                                                          | -1.902 | 0.5 | Gene/proteine expression |
| LOC290300  | similar to tumor necrosis factor receptor superfamily,<br>member 19 isoform 2 precursor | -1.896 | 0.3 | Signaling/Communication  |
| XM_238549  | similar to cytoskeletal protein 49                                                      | -1.889 | 0.4 | Cell structure/Motility  |
| Gfra2      | glial cell line derived neutrophilic factor family receptor<br>alpha2                   | -1.885 | 0.7 | Signaling/Communication  |
| Dcamk1l    | double cortin and calcium/calmodulin-dependent<br>protein kinase-like1                  | -1.880 | 0.3 | Cell structure/Motility  |
| Gripap1    | GRIP1 associated protein                                                                | -1.873 | 0.4 | Metabolism               |

|          |                                         |        |     |                          |
|----------|-----------------------------------------|--------|-----|--------------------------|
| Ckap4    | cytoskeleton-associated protein 4       | -1.860 | 0.3 | Cell structure/Motility  |
| Creld1   | cysteine-rich with EGF-like domains 1   | -1.860 | 0.5 | unclassified             |
| C12orf10 | MYG1 protein                            | -1.860 | 0.6 | unclassified             |
| Ril      | reversion-induced LIM (RIL) protein     | -1.855 | 0.6 | Signaling/Communication  |
| Wars     | tryptophanyl-tRNA synthetase            | -1.854 | 0.1 | Gene/proteine expression |
| Pgbd5    | piggybac transposable element derived 5 | -1.845 | 0.6 | unclassified             |
